# Supplementary material
Source: MDPI journal article supplement (https://www.mdpi.com/2073-445X/12/7/1269)
Supplement: s1 [file s1]

## Supplementary

**Table S1.** Experts rating of the threats to the oases.

| Expert          | 1 | 2 | 3 | 4 | 5 | 6 | 7 | 8 | 9 | 10 | Sum |
|-----------------|---|---|---|---|---|---|---|---|---|----|-----|
| Threats         |   |   |   |   |   |   |   |   |   |    |     |
| Water           | 5 | 4 | 5 | 5 | 5 | 5 | 5 | 4 | 5 | 4  | 47  |
| Urban expansion | 2 | 5 | 3 | 2 | 2 | 4 | 4 | 5 | 4 | 3  | 34  |
| Soil            | 4 | 2 | 4 | 4 | 4 | 3 | 2 | 2 | 1 | 5  | 31  |
| Palm diseases   | 3 | 3 | 2 | 3 | 3 | 2 | 3 | 3 | 3 | 2  | 27  |
| Legal framework | 1 | 1 | 1 | 1 | 1 | 1 | 1 | 1 | 2 | 1  | 11  |

**Table S2.** Fundamental scale in AHP (Saaty, 1980).

| The intensity of importance on absolute scale | Definition                                          | Explanation                                                                                      |
|-----------------------------------------------|-----------------------------------------------------|--------------------------------------------------------------------------------------------------|
| 1                                             | Equal importance                                    | Two activities equally to the objective                                                          |
| 3                                             | Moderate importance of one over other               | Experience and judgment strongly favor one activity over another.                                |
| 5                                             | Essential or strong importance                      | Experience and judgment strongly favor one activity over another.                                |
| 7                                             | Extreme importance                                  | Activity is strongly favored, and its dominance is demonstrated in practice.                     |
| 9                                             | Extreme importance                                  | The evidence favoring one activity over another is of the highest possible order of affirmation. |
| 2, 4, 6, 8                                    | Intermediate values between the two adjacent values | When compromise needed                                                                           |

**Table S3.** Confusion matrix for LULC classification.

| 1972      | Built-up | Grass | Date Palm | Desert | Highland | Total |       |      |
|-----------|----------|-------|-----------|--------|----------|-------|-------|------|
| Built-up  | 55       | 1     | 0         | 0      | 2        | 58    |       |      |
| Grass     | 2        | 47    | 0         | 1      | 0        | 50    |       |      |
| Date Palm | 0        | 0     | 49        | 1      | 0        | 50    |       |      |
| Desert    | 1        | 2     | 1         | 52     | 1        | 57    | PA    | 0.94 |
| Highland  | 0        | 0     | 0         | 0      | 50       | 50    | Kappa | 0.85 |
| Total     | 58       | 50    | 50        | 54     | 53       | 265   |       |      |
| PA        | 0.95     | 0.94  | 0.98      | 0.96   | 1        |       |       |      |
| UA        | 0.95     | 0.94  | 0.98      | 0.96   | 1        |       |       |      |

| <b>1984</b> | Built-up | Grass | Date Palm | Desert | Highland | Total |              |             |
|-------------|----------|-------|-----------|--------|----------|-------|--------------|-------------|
| Built-up    | 56       | 1     | 0         | 0      | 1        | 58    |              |             |
| Grass       | 2        | 48    | 0         | 0      | 0        | 50    |              |             |
| Date Palm   | 0        | 0     | 50        | 0      | 0        | 50    |              |             |
| Desert      | 1        | 1     | 1         | 53     | 0        | 56    | <b>PA</b>    | <b>0.95</b> |
| Highland    | 0        | 0     | 0         | 0      | 50       | 50    | <b>Kappa</b> | <b>0.91</b> |
| Total       | 59       | 50    | 51        | 53     | 51       | 264   |              |             |
| PA          | 0.93     | 0.96  | 1         | 0.96   | 1        |       |              |             |
| UA          | 0.94     | 0.96  | 1         | 0.96   | 1        |       |              |             |

| <b>1993</b> | Built-up | Grass | Date Palm | Desert | Highland | Total |              |             |
|-------------|----------|-------|-----------|--------|----------|-------|--------------|-------------|
| Built-up    | 56       | 1     | 0         | 0      | 2        | 59    |              |             |
| Grass       | 2        | 47    | 0         | 1      | 0        | 50    |              |             |
| Date Palm   | 0        | 0     | 50        | 0      | 0        | 50    |              |             |
| Desert      | 1        | 2     | 1         | 52     | 1        | 57    | <b>PA</b>    | <b>0.94</b> |
| Highland    | 0        | 0     | 0         | 0      | 50       | 50    | <b>Kappa</b> | <b>0.90</b> |
| Total       | 59       | 50    | 51        | 53     | 53       | 266   |              |             |
| PA          | 0.95     | 0.94  | 1         | 0.93   | 0.94     |       |              |             |
| UA          | 0.94     | 0.96  | 1         | 0.93   | 0.9      |       |              |             |

| <b>2003</b> | Built-up | Grass | Date Palm | Desert | Highland | Total |              |             |
|-------------|----------|-------|-----------|--------|----------|-------|--------------|-------------|
| Built-up    | 54       | 2     | 0         | 0      | 2        | 58    |              |             |
| Grass       | 3        | 45    | 0         | 2      | 0        | 50    |              |             |
| Date Palm   | 0        | 0     | 48        | 2      | 0        | 50    |              |             |
| Desert      | 1        | 1     | 1         | 51     | 2        | 56    | <b>PA</b>    | <b>0.93</b> |
| Highland    | 0        | 0     | 0         | 0      | 49       | 49    | <b>Kappa</b> | <b>0.88</b> |
| Total       | 58       | 48    | 49        | 55     | 53       | 263   |              |             |
| PA          | 0.9      | 0.9   | 0.96      | 0.94   | 0.98     |       |              |             |
| UA          | 0.92     | 0.88  | 0.94      | 0.93   | 0.94     |       |              |             |

| <b>2013</b> | Built-up | Vegetation | Date Palm | Desert | Highland | Total |              |             |
|-------------|----------|------------|-----------|--------|----------|-------|--------------|-------------|
| Built-up    | 56       | 0          | 0         | 0      | 1        | 57    |              |             |
| Grass       | 2        | 48         | 0         | 0      | 0        | 50    |              |             |
| Date Palm   | 0        | 0          | 50        | 0      | 0        | 50    |              |             |
| Desert      | 1        | 1          | 1         | 52     | 0        | 55    | <b>PA</b>    | <b>0.97</b> |
| Highland    | 0        | 0          | 0         | 0      | 50       | 50    | <b>Kappa</b> | <b>0.93</b> |
| Total       | 59       | 49         | 51        | 52     | 51       | 262   |              |             |
| PA          | 0.97     | 0.96       | 1         | 0.96   | 1        |       |              |             |
| UA          | 0.98     | 0.96       | 1         | 0.96   | 1        |       |              |             |

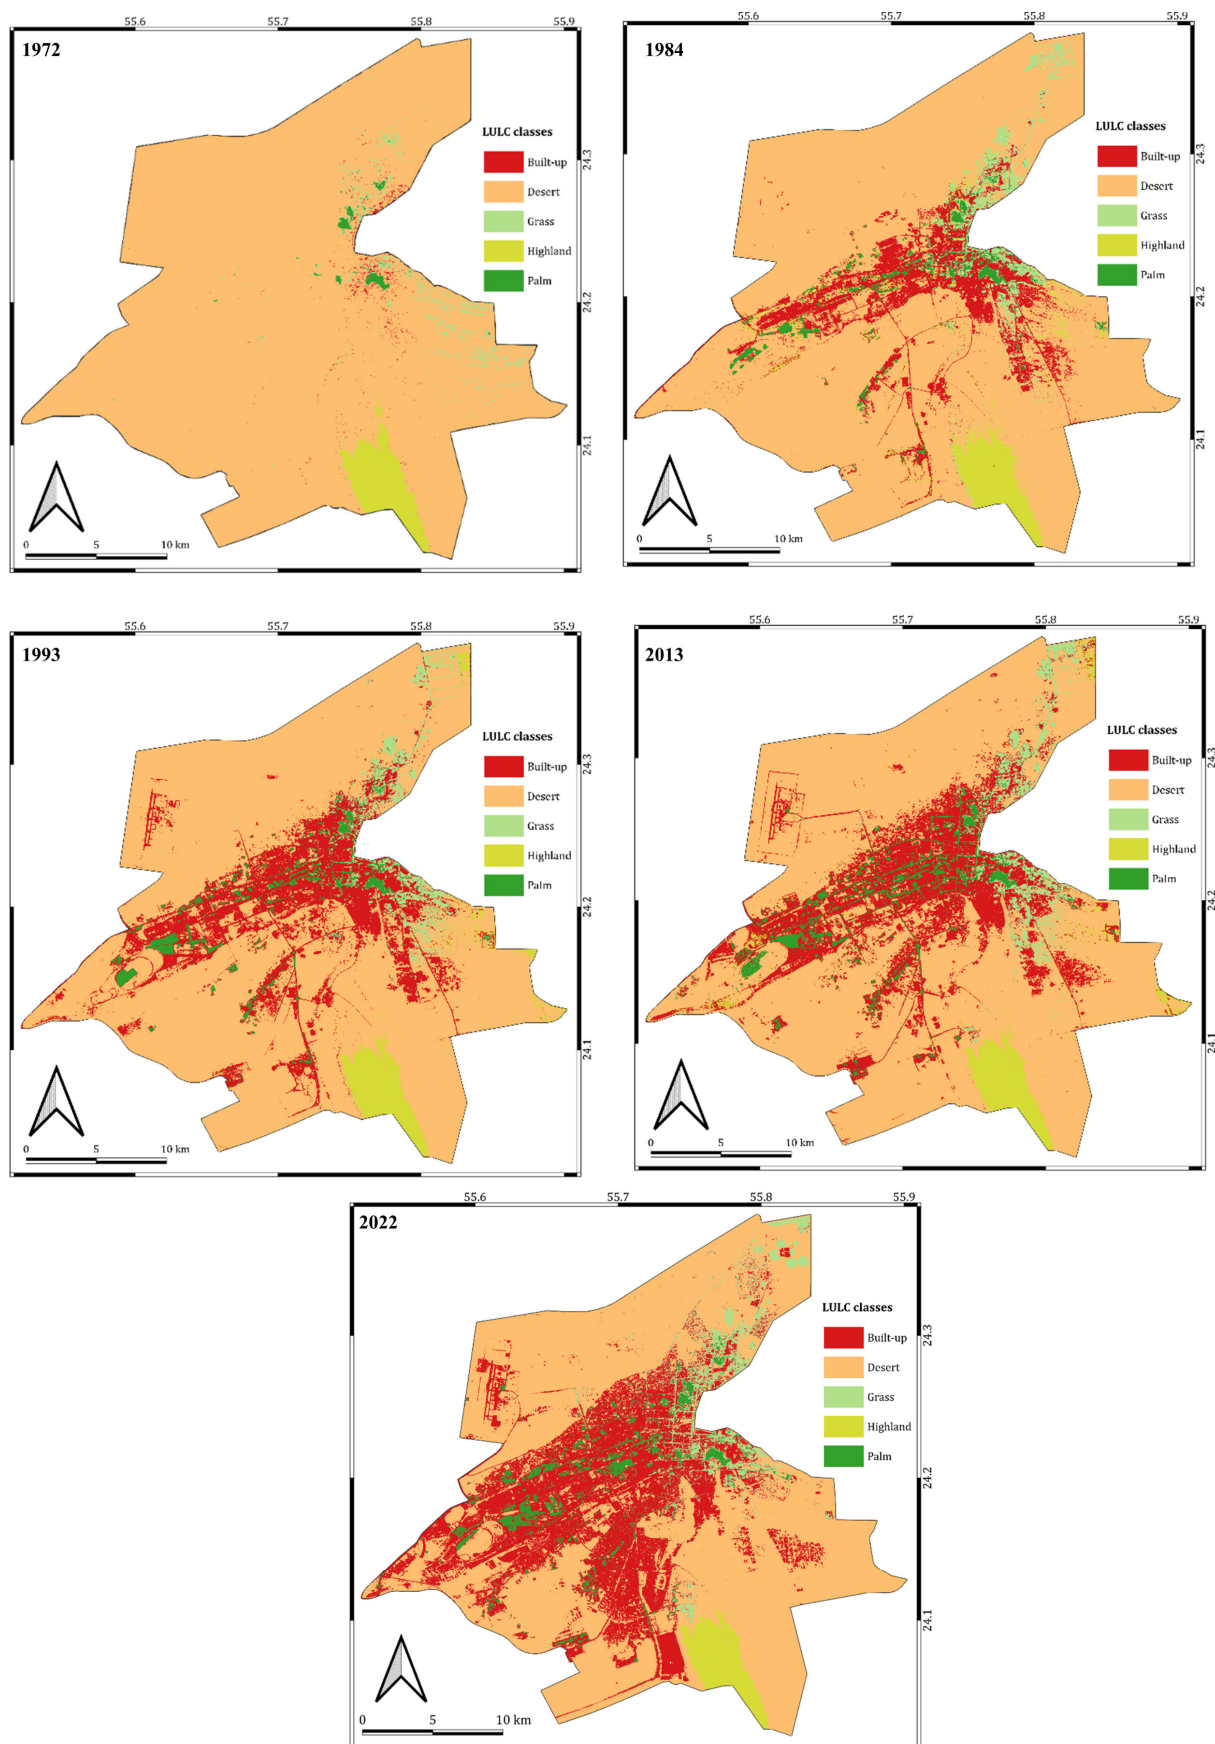

**Figure S1.** Land use and land cover of Al Ain.
